# Supplementary material for: Solvent dependent reactivities of di-, tetra- and hexanuclear manganese complexes: syntheses, structures and magnetic properties
Source: Royal Society of Chemistry journal article supplement (doi:10.1039/c4dt03822c), 2015-01-01
Supplement: c4dt03822c1.pdf [file c4dt03822c1.pdf]

## Supporting Information

### Solvents dependent reactivities of di-, tetra- and hexanuclear manganese complexes: syntheses, structures and magnetic properties

Hua Yang,<sup>a</sup> Fan Cao,<sup>b</sup> Dacheng Li,<sup>a</sup> Suyuan Zeng,<sup>a</sup> You Song,<sup>\*,b</sup> and Jianmin Dou<sup>\*,a</sup>

Received (in XXX, XXX) Xth XXXXXXXXXX 20XX, Accepted Xth XXXXXXXXXX 20XX

DOI: 10.1039/b000000x

#### Contents:

**Scheme S1** The possible reaction process of complexes **1–5** with the original ligand undergoing in situ reaction in different solvents.

**Fig. S1.** UV-vis spectra

**Fig. S2.** Thermogravimetric Analysis

**Fig. S3** The 3D packing arrangement of **1** formed through C–H···O supramolecular interactions.

**Fig. S4** The 3D packing arrangement of **2** formed through C–H···O supramolecular interactions.

**Fig. S5** The 3D packing arrangement of **3** formed through C–H···O supramolecular interactions.

**Fig. S6** The 3D packing arrangement of **5** formed through C–H···O supramolecular interactions.

**Fig. S7** The spin states of complex **3** and magnetic exchange paths.

**Fig. S8** Plots of isothermal magnetization  $M$  versus field  $H$  for complex **5** between 1.8–5 K.

**Fig. S9** Plots of reduced magnetization  $M$  versus  $H/T$  at the indicated applied fields.

**Fig. S10** The local spin in each triangular aza8-MC-3 subunit.

**Table S1** Selected bond distances (Å) and angles (°) for complexes **1–3** and **5**.

**Table S2** The supramolecular interactions in complexes **1–3** and **5**.

**Theoretical Model for complex 3.**

**The magnetic susceptibility of complex 5.**

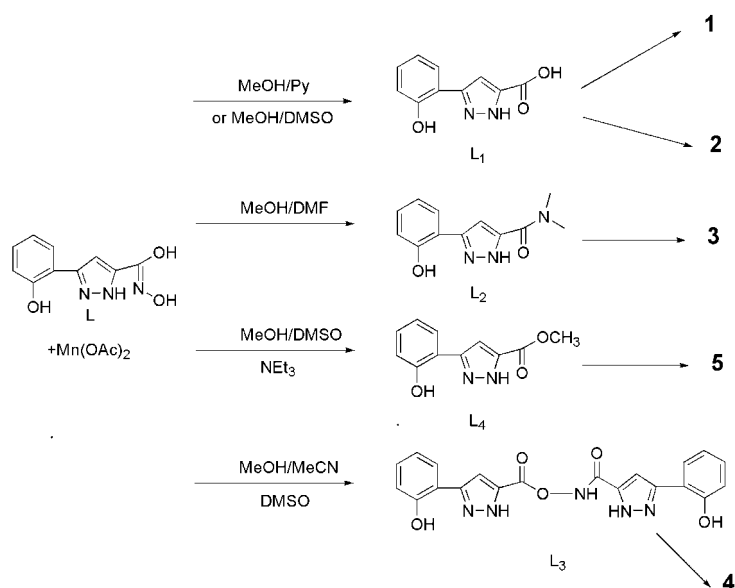

Scheme S1. The possible reaction process of complexes **1–5** with the original ligand undergoing in situ reaction in different solvents.

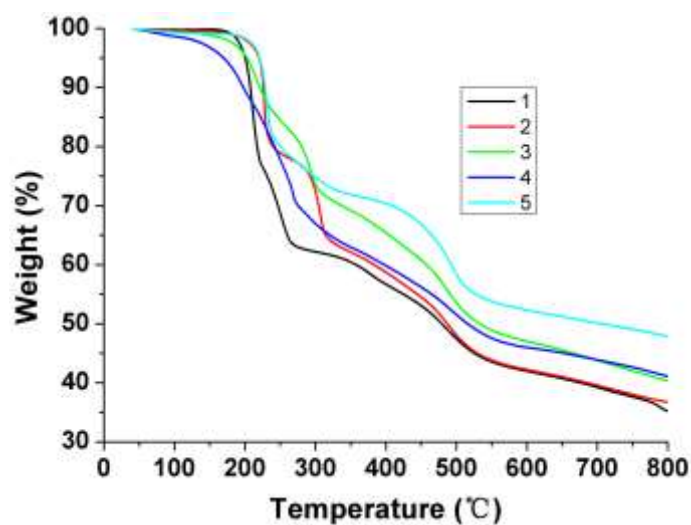

Fig. S1. TGA plots of complexes **1–5**.

The TGA curves of complexes **1–5** display different weight loss. The weight loss began from 200–300°C and corresponded to the loss of the coordination solvent molecules. Upon further heating, the organic frameworks collapse to form metal oxide components.

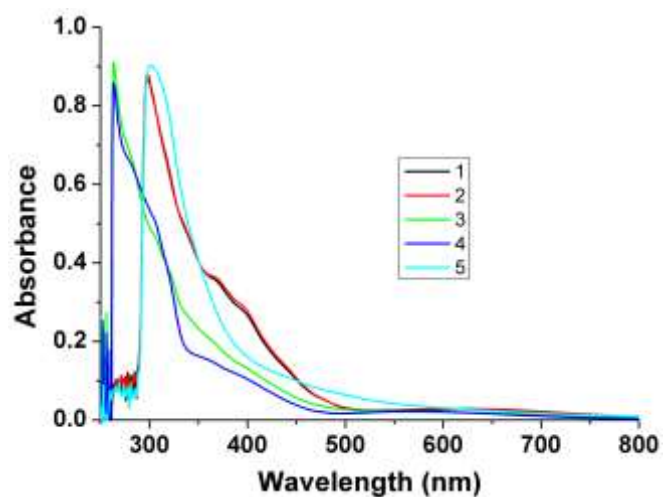

Fig. S2. UV-vis spectra for complexes **1–5** in DMF.

The UV-vis absorption spectra of complexes 1–5 dissolved in DMF exhibit two kinds of different characteristic absorption bands. Complexes 1, 2 and 5 present the same adsorption bands at 300 nm, while the adsorption peaks were observed for complex 3 and 4 at 263nm.

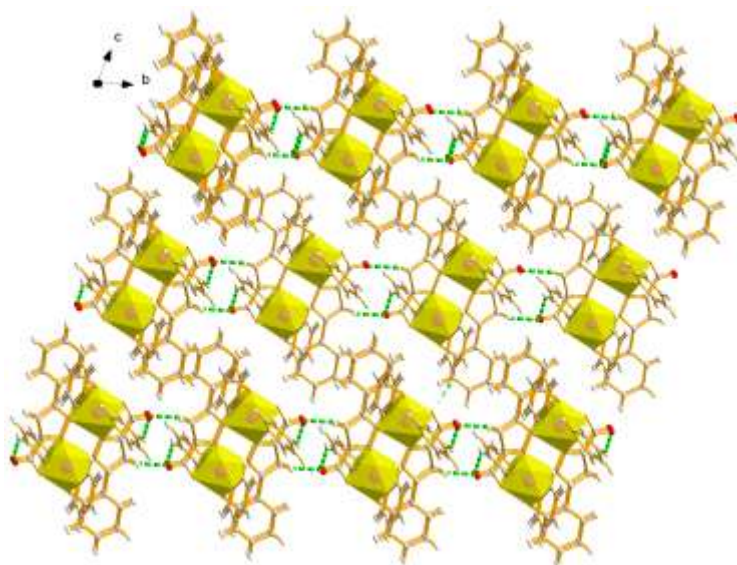

Fig. S3. Three-dimensional framework via supramolecular interactions of complex **1**.

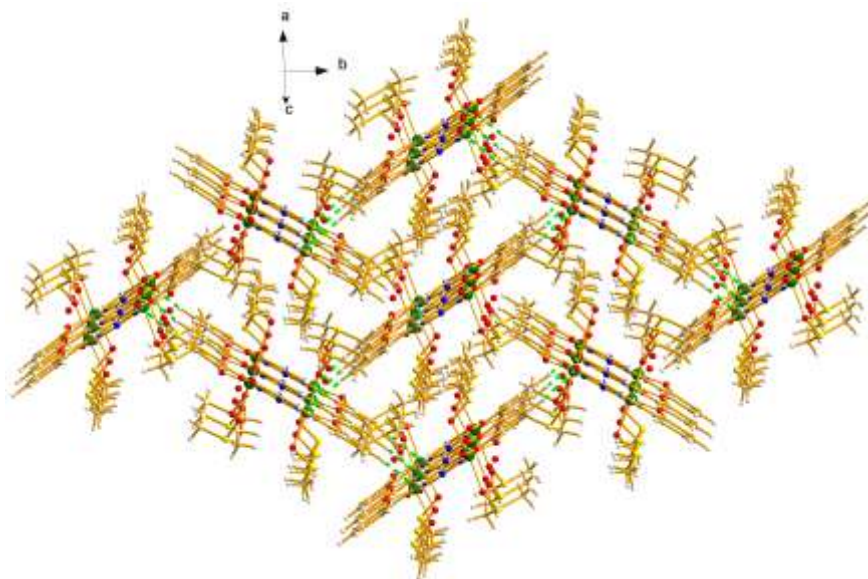

Fig. S4. Three-dimensional framework via supramolecular interactions of complex **2**.

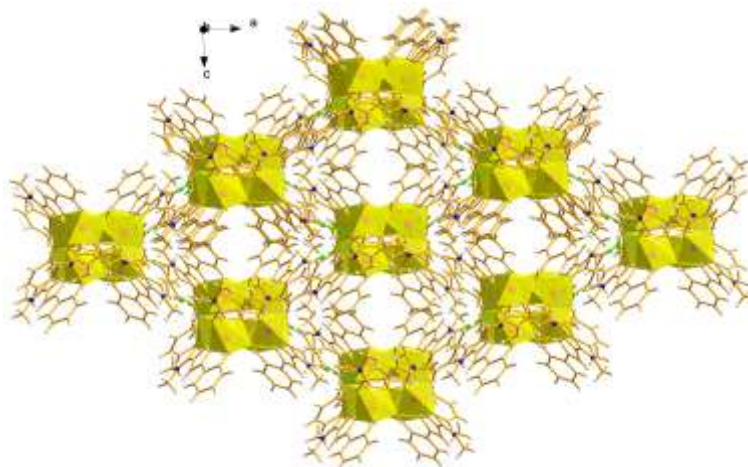

Fig. S5. Three-dimensional framework via supramolecular interactions of complex **3**.

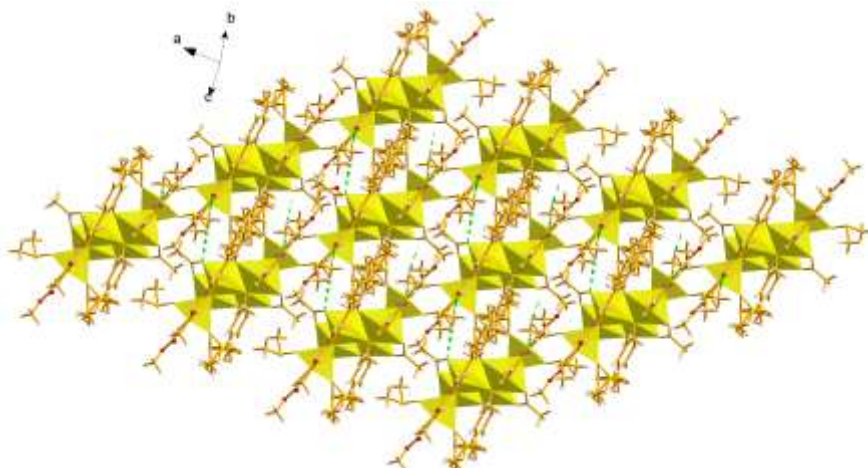

Fig. S6. Two-dimensional framework via supramolecular interactions of complex **5**.

Table S1. Selected bond distances (Å) and angles (°) for complex **1–3** and **5**.

| 1                   |            | 2                 |           |
|---------------------|------------|-------------------|-----------|
| Mn(1)-O(3)#1        | 1.8432(16) | Mn(1)-O(3)        | 1.842(3)  |
| Mn(1)-O(1)          | 1.9547(15) | Mn(1)-O(1)        | 1.939(3)  |
| Mn(1)-N(2)#1        | 1.9849(17) | Mn(1)-N(2)        | 1.967(3)  |
| Mn(1)-N(1)          | 1.9977(18) | Mn(1)-N(1)        | 1.996(3)  |
| Mn(1)-N(4)          | 2.355(2)   | Mn(1)-O(5)        | 2.231(4)  |
| Mn(1)-N(5)          | 2.368(2)   | Mn(1)-O(4)        | 2.285(8)  |
| O(3)#1-Mn(1)-O(1)   | 93.23(7)   | O(3)-Mn(1)-O(1)   | 91.64(14) |
| O(3)#1-Mn(1)-N(2)#1 | 89.79(7)   | O(3)-Mn(1)-N(2)   | 90.49(14) |
| O(1)-Mn(1)-N(1)     | 81.55(7)   | O(1)-Mn(1)-N(1)   | 81.16(13) |
| N(2)#1-Mn(1)-N(1)   | 95.54(7)   | N(2)-Mn(1)-N(1)   | 96.80(13) |
| O(3)#1-Mn(1)-N(4)   | 87.57(7)   | O(3)-Mn(1)-O(5)   | 90.9(2)   |
| O(1)-Mn(1)-N(4)     | 89.10(7)   | O(1)-Mn(1)-O(5)   | 88.34(16) |
| N(2)#1-Mn(1)-N(4)   | 92.73(7)   | N(2)-Mn(1)-O(5)   | 89.27(16) |
| N(1)-Mn(1)-N(4)     | 88.84(7)   | N(1)-Mn(1)-O(5)   | 91.29(17) |
| O(3)#1-Mn(1)-N(5)   | 89.86(8)   | O(3)-Mn(1)-O(4)   | 95.9(3)   |
| O(1)-Mn(1)-N(5)     | 83.73(7)   | O(1)-Mn(1)-O(4)   | 91.3(2)   |
| N(2)#1-Mn(1)-N(5)   | 94.59(7)   | N(2)-Mn(1)-O(4)   | 90.9(2)   |
| N(1)-Mn(1)-N(5)     | 93.03(7)   | N(1)-Mn(1)-O(4)   | 81.9(2)   |
| 3                   |            |                   |           |
| Mn(1)-O(3)#1        | 1.877(4)   | Mn(1)-N(2)        | 2.012(5)  |
| Mn(1)-O(1)          | 1.883(5)   | Mn(1)-O(3)        | 2.150(4)  |
| Mn(1)-N(1)          | 1.990(5)   | Mn(1)-O(2)        | 2.406(5)  |
| O(3)#1-Mn(1)-N(1)   | 85.5(2)    | O(1)-Mn(1)-N(1)   | 87.7(2)   |
| O(3)#1-Mn(1)-N(2)   | 89.98(19)  | O(1)-Mn(1)-N(2)   | 96.8(2)   |
| O(3)#1-Mn(1)-O(3)   | 91.9(2)    | O(1)-Mn(1)-O(3)   | 90.1(2)   |
| N(2)-Mn(1)-O(3)     | 78.9(2)    | O(3)#1-Mn(1)-O(2) | 95.88(19) |
| O(1)-Mn(1)-O(2)     | 85.7(2)    | N(2)-Mn(1)-O(2)   | 70.3(2)   |
| 5                   |            |                   |           |
| Mn(1)-O(10)         | 1.808(8)   | Mn(1)-O(6)        | 1.833(8)  |
| Mn(1)-N(6)          | 1.925(10)  | Mn(1)-O(9)        | 1.957(7)  |
| Mn(1)-O(7)          | 2.127(9)   | Mn(1)-O(3)        | 2.574(5)  |
| Mn(2)-O(10)#1       | 1.796(7)   | Mn(2)-O(3)        | 1.877(7)  |
| Mn(2)-N(3)          | 1.955(10)  | Mn(2)-O(9)#1      | 1.974(8)  |
| Mn(2)-O(8)#1        | 2.123(9)   | Mn(2)-O(9)        | 2.332(8)  |
| Mn(3)-O(10)         | 2.069(8)   | Mn(3)-O(11)       | 2.080(9)  |
| Mn(3)-O(12)         | 2.111(9)   | Mn(3)-N(2)#1      | 2.182(10) |
| Mn(3)-N(5)          | 2.212(11)  | Mn(3)-O(1)        | 2.812(3)  |
| Mn(1)-Mn(2)#1       | 2.813(3)   | Mn(2)-Mn(1)#1     | 2.813(3)  |
| O(10)-Mn(1)-N(6)    | 91.0(4)    | O(6)-Mn(1)-N(6)   | 89.4(4)   |
| O(10)-Mn(1)-O(9)    | 81.1(3)    | O(6)-Mn(1)-O(9)   | 98.0(3)   |
| O(10)-Mn(1)-O(7)    | 92.4(4)    | O(6)-Mn(1)-O(7)   | 91.3(4)   |
| N(6)-Mn(1)-O(7)     | 99.1(4)    | O(9)-Mn(1)-O(7)   | 89.9(3)   |

|                      |         |                     |         |
|----------------------|---------|---------------------|---------|
| O(10)#1-Mn(2)-N(3)   | 89.4(4) | O(3)-Mn(2)-N(3)     | 90.0(4) |
| O(10)#1-Mn(2)-O(9)#1 | 80.9(3) | O(3)-Mn(2)-O(9)#1   | 98.9(3) |
| O(10)#1-Mn(2)-O(8)#1 | 94.2(3) | O(3)-Mn(2)-O(8)#1   | 94.9(3) |
| N(3)-Mn(2)-O(8)#1    | 96.6(4) | O(9)#1-Mn(2)-O(8)#1 | 88.5(3) |
| O(10)#1-Mn(2)-O(9)   | 89.4(3) | O(3)-Mn(2)-O(9)     | 81.6(3) |
| N(3)-Mn(2)-O(9)      | 97.6(4) | O(9)#1-Mn(2)-O(9)   | 78.1(3) |
| O(10)-Mn(3)-N(2)#1   | 80.1(3) | O(11)-Mn(3)-N(2)#1  | 92.3(4) |
| O(12)-Mn(3)-N(2)#1   | 94.4(4) | O(10)-Mn(3)-N(5)    | 79.8(3) |
| O(11)-Mn(3)-N(5)     | 92.0(4) | O(12)-Mn(3)-N(5)    | 96.3(4) |

Symmetry transformations used to generate equivalent atoms: Complex **1**, #1: -x+2, -y+1, -z+1; complex **2**, #1: -x+1, -y+1, -z; Complex **3**, #1: x+1/4, -y+5/4, -z+1/4; #2: -x+5/4, y-1/4, -z+1/4; Complex **5**, #1: -x, -y, -z.

Table S2. The supramolecular interactions in complexes **1–5**.

| complex 1     |          |            |             |
|---------------|----------|------------|-------------|
|               | H...O(Å) | C-H...O(Å) | ∠C-H...O(°) |
| C3-H3...O2    | 2.556    | 3.457      | 163.3       |
| C17-H17...O1  | 2.615    | 3.436      | 147.5       |
| C13-H13...O2  | 2.506    | 3.205      | 132.3       |
| Complex 2     |          |            |             |
| C8-H8...O2    | 2.668    | 3.590      | 171.0       |
| C3-H3...O2    | 2.401    | 3.278      | 156.9       |
| Complex 3     |          |            |             |
| C11-H11B...O2 | 2.633    | 3.584      | 171.3       |
| C11-H12B...O2 | 2.702    | 3.630      | 162.9       |
| C12-H12C...O1 | 2.574    | 3.331      | 136.1       |
| Complex 5     |          |            |             |
| C27-H27A...O2 | 2.556    | 3.501      | 167.9       |
| C27-H27C...O8 | 2.581    | 3.509      | 163.1       |

Table S3. BVS calculations for the complexes 1-5.

|           |       | Mn <sup>2+</sup> | Mn <sup>3+</sup> | Mn <sup>4+</sup> |
|-----------|-------|------------------|------------------|------------------|
| Complex 1 | Mn(1) | 3.435722         | <b>3.168145</b>  | 3.10877          |
| Complex 2 | Mn(1) | 3.552557         | <b>3.27588</b>   | 3.214486         |
| Complex 3 | Mn(1) | 3.509644         | <b>3.236309</b>  | 3.175657         |
| Complex 4 | Mn(1) | 3.309456         | <b>3.051712</b>  | 2.994519         |
|           | Mn(2) | <b>2.215938</b>  | 2.043359         | 2.005064         |
|           | Mn(3) | <b>2.177418</b>  | 2.007838         | 1.970209         |
|           | Mn(4) | 3.339875         | <b>3.079762</b>  | 3.022044         |
| Complex 5 | Mn(1) | 3.845362         | <b>3.545881</b>  | 3.479427         |
|           | Mn(2) | 3.797979         | <b>3.502188</b>  | 3.436553         |
|           | Mn(3) | <b>2.219678</b>  | 2.046807         | 2.008447         |

(1) I. D. Brown and D. Altermatt, *Acta Cryst.*, **B41**, 244.

(2) H. H. Thorp, *Inorg. Chem.*, 1992, **31**, 1585.

(3) W. T. Liu and H. H. Thorp, *Inorg. Chem.*, 1993, **32**, 4102.

### Theoretical Model for complex 3.

The complete spin Hamiltonian for complex **3** is given by Eq 1.  $H = -2J(S_1S_2 + S_2S_3 + S_3S_4 + S_4S_1)$  (1). The spin state of complex **3** and magnetic exchange paths are given in Fig. S7.

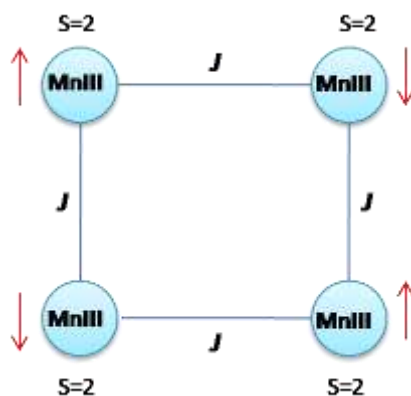

Fig. S7 The spin states of complex **3** and magnetic exchange paths

By use of the Kambe vector coupling method, with the total spin of the system defined as  $S_A = S_1 + S_3$ ,  $S_B = S_2 + S_4$ , and  $S_T = S_A + S_B$ , the spin Hamiltonian can be transformed into that Eq. (2).  $H = -J(S_T^2 - S_A^2 - S_B^2)$  (2). The corresponding expression of the relative energies is given in Eq. (3).

$$E(S_T, S_A, S_B) = -J[S_T(S_T+1) - S_A(S_A+1) - S_B(S_B+1)] \quad (3)$$

The molecule magnetic susceptibility expression in the van Vleck equation is given

below:

$$x = J/\kappa T;$$

$N$  is Avogadro's number;

$\kappa$  is Boltzmann constant;

$\beta$  is Bohr magneton.

The analysis of the relative energies represents 84 states. If  $J < 0$ , the ground state is 0 with energy  $E(0, 4, 4)$ . Thus, the local spin can be obtained, and the spin coupling displayed antiferromagnetic interactions.

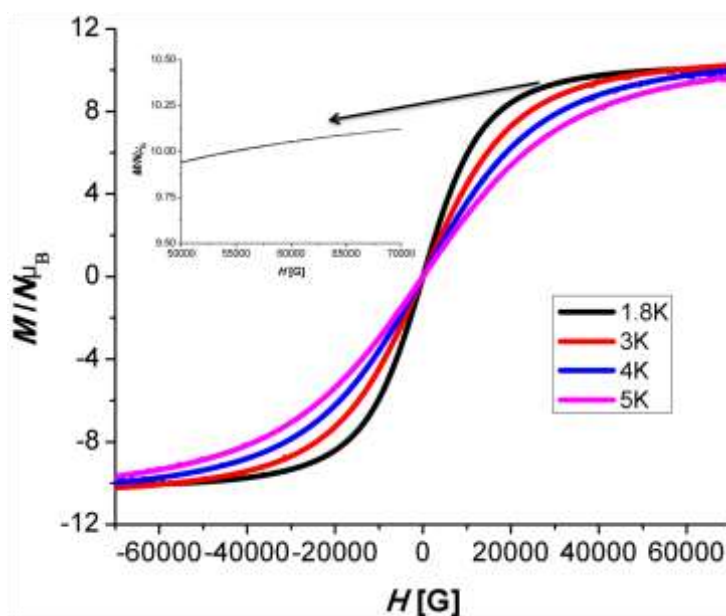

Fig. S8. Plots of isothermal magnetization  $M$  versus field  $H$  for complex 5 between 1.8–5 K.



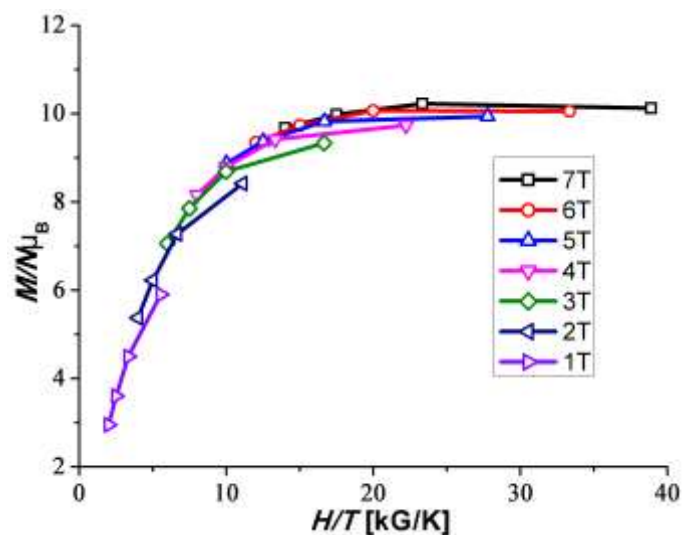

Fig. S9. Plots of reduced magnetization  $M$  versus  $H/T$  at the indicated applied fields.

### The magnetic susceptibility of Complex 5

Analytical expression of the magnetic susceptibility for an  $S = 2-2-5/2$  magnetic trimer in the low field is given as follow:

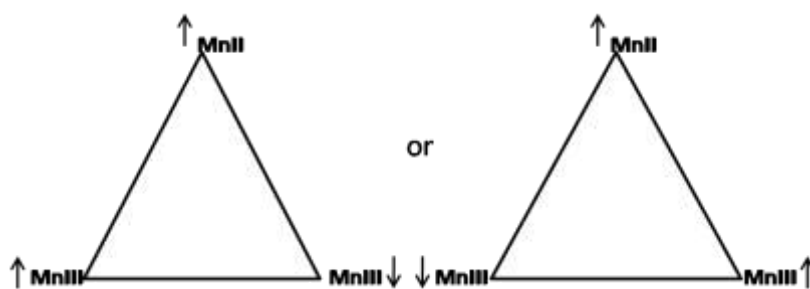

Fig. S10. The local spin in each triangular aza8-MC-3 subunit.
